# Supplementary material
Source: publisher site journal article supplement (https://www.spandidos-publications.com/8563/downloadSupplementary)
Supplement: Supplementary file 1 [file downloadSupplementary]

Table SI. Relationship between clinicopathological characteristics and pre-treatment miRNA levels without OAA1 enrichment.

| Clinicopathologic<br>al characteristic  | miR-320a        |                       |         | miR-320b        |                       |         | miR-3613-5p           |                  |         |
|-----------------------------------------|-----------------|-----------------------|---------|-----------------|-----------------------|---------|-----------------------|------------------|---------|
|                                         | Low (n=23)      | High (n=25)           | P-value | Low (n=13)      | High (n=35)           | P-value | Low (n=21)            | High (n=27)      | P-value |
| Mean $\pm$ SD age,<br>years             | 67.7 $\pm$ 8.35 | 63.68 $\pm$ 10.8<br>6 | 0.16    | 66.4 $\pm$ 7.88 | 65.31 $\pm$ 10.5<br>7 | 0.742   | 65.95 $\pm$ 10.4<br>9 | 65.31 $\pm$ 9.52 | 0.854   |
| Sex <sup>a</sup>                        |                 |                       |         |                 |                       |         |                       |                  |         |
| Male                                    | 18              | 20                    | 1.0     | 11              | 27                    | 0.706   | 18                    | 20               | 0.478   |
| Female                                  | 5               | 5                     |         | 2               | 8                     |         | 3                     | 7                |         |
| Smoking status <sup>a</sup>             |                 |                       |         |                 |                       |         |                       |                  |         |
| Smoker                                  | 3               | 3                     | 1.0     | 13              | 29                    | 0.171   | 19                    | 23               | 0.683   |
| Nonsmoker                               | 20              | 22                    |         | 0               | 6                     |         | 2                     | 4                |         |
| Levels of tumor<br>markers <sup>a</sup> |                 |                       |         |                 |                       |         |                       |                  |         |
| Low                                     | 9               | 11                    | 1.0     | 5               | 15                    | 0.749   | 10                    | 10               | 0.371   |
| High                                    | 12              | 14                    |         | 8               | 18                    |         | 9                     | 17               |         |
| Unknown                                 | 2               | 0                     |         | 0               | 2                     |         | 2                     | 0                |         |

|                                |    |    |       |   |    |       |    |    |       |
|--------------------------------|----|----|-------|---|----|-------|----|----|-------|
| Pathology <sup>a</sup>         |    |    |       |   |    |       |    |    |       |
| ADC                            | 16 | 17 | 1.0   | 9 | 24 | 1.0   | 14 | 19 | 1.0   |
| SQC                            | 7  | 8  |       | 4 | 11 |       | 7  | 8  |       |
| Recurrent disease <sup>b</sup> |    |    |       |   |    |       |    |    |       |
| Yes                            | 9  | 15 | 0.149 | 5 | 19 | 0.33  | 10 | 14 | 0.771 |
| No                             | 14 | 10 |       | 8 | 16 |       | 11 | 13 |       |
| Driver mutations <sup>a</sup>  |    |    |       |   |    |       |    |    |       |
| EGFR                           | 0  | 3  | 0.339 | 0 | 3  | 0.836 | 2  | 1  | 0.534 |
| ALK                            | 1  | 0  |       | 0 | 1  |       | 0  | 1  |       |
| Wild-type                      | 15 | 14 |       | 9 | 20 |       | 11 | 18 |       |
| Unknown                        | 7  | 8  |       | 4 | 11 |       | 8  | 7  |       |
| PD-L1 status <sup>a</sup>      |    |    |       |   |    |       |    |    |       |
| Negative                       | 7  | 4  | 0.671 | 4 | 7  | 1.0   | 6  | 5  | 1.0   |
| Positive                       | 13 | 4  |       | 7 | 10 |       | 10 | 7  |       |
| Unknown                        | 3  | 17 |       | 2 | 17 |       | 5  | 15 |       |

|                                                 |                 |                 |       |                 |                 |                    |                 |                 |                    |
|-------------------------------------------------|-----------------|-----------------|-------|-----------------|-----------------|--------------------|-----------------|-----------------|--------------------|
| CD8 expression <sup>a</sup>                     |                 |                 |       |                 |                 |                    |                 |                 |                    |
| Negative                                        | 5               | 1               | 0.640 | 2               | 4               | 1.0                | 3               | 3               | 1.0                |
| Positive                                        | 15              | 7               |       | 9               | 13              |                    | 13              | 9               |                    |
| Unknown                                         | 3               | 17              |       | 2               | 18              |                    | 5               | 15              |                    |
| Mean $\pm$ SD<br>number of<br>previous regimens | 2.39 $\pm$ 1.87 | 2.20 $\pm$ 1.41 | 0.69  | 2.15 $\pm$ 1.91 | 2.34 $\pm$ 1.55 | 0.73               | 2.05 $\pm$ 1.86 | 2.48 $\pm$ 1.45 | 0.368              |
| IrAE <sup>a</sup>                               |                 |                 |       |                 |                 |                    |                 |                 |                    |
| Absent                                          | 6               | 4               | 0.487 | 4               | 6               | 0.425              | 5               | 5               | 0.729              |
| Present                                         | 17              | 21              |       | 9               | 29              |                    | 16              | 22              |                    |
| Clinical responses<br>to nivolumab <sup>a</sup> |                 |                 |       |                 |                 |                    |                 |                 |                    |
| PR                                              | 9               | 12              | 0.162 | 7               | 3               | 0.002 <sup>c</sup> | 9               | 1               | 0.001 <sup>c</sup> |
| SD + PD                                         | 16              | 22              |       | 6               | 32              |                    | 12              | 26              |                    |

|                                                    |    |    |       |   |    |       |    |    |       |
|----------------------------------------------------|----|----|-------|---|----|-------|----|----|-------|
| Reasons for treatment discontinuation <sup>a</sup> |    |    |       |   |    |       |    |    |       |
| Disease progression                                | 16 | 18 | 0.183 | 8 | 26 | 0.173 | 15 | 19 | 0.605 |
| IrAE                                               | 3  | 2  |       | 2 | 3  |       | 2  | 3  |       |
| PS down                                            | 1  | 5  |       | 1 | 5  |       | 2  | 4  |       |
| Death by AMI                                       | 1  | 0  |       | 0 | 1  |       | 0  | 1  |       |
| Treatment continuation                             | 2  | 0  |       | 2 | 0  |       | 2  | 0  |       |

<sup>a</sup>Fisher's exact test. <sup>b</sup> $\chi^2$  test. <sup>c</sup>P<0.05. ADC, adenocarcinoma; ALK, anaplastic lymphoma kinase; AMI, acute myocardial infarction; EGFR, epidermal growth factor; irAE, immune-related adverse events; OAA1, *Oscillatoria agardhii* agglutinin 1; PD-L1, programmed death ligand 1; PR, partial response; PS, performance status; SD + PD, stable or progressive disease; SQC, squamous cell carcinoma.

Table SII. Relationship between clinicopathological characteristics, pre-treatment levels of miRNAs, and OAA1 enrichment.

| Clinicopathological characteristic | OAA1 captured miR-320a |                   |         | OAA1 captured miR-320b |                   |         | OAA1 captured miR-3613-5p |                  |         |
|------------------------------------|------------------------|-------------------|---------|------------------------|-------------------|---------|---------------------------|------------------|---------|
|                                    | Low (n=17)             | High (n=31)       | P-value | Low (n=10)             | High (n=38)       | P-value | Low (n=16)                | High (n=32)      | P-value |
| Mean $\pm$ SD age, years           | 66.71 $\pm$ 7.166      | 65.00 $\pm$ 11.11 | 0.672   | 66.9 $\pm$ 8.66        | 65.26 $\pm$ 10.22 | 0.645   | 66.31 $\pm$ 9.96          | 65.25 $\pm$ 9.93 | 0.73    |
| Sex <sup>a</sup>                   |                        |                   |         |                        |                   |         |                           |                  |         |
| Male                               | 15                     | 23                | 0.459   | 9                      | 29                | 0.664   | 12                        | 26               | 0.712   |
| Female                             | 2                      | 8                 |         | 1                      | 9                 |         | 4                         | 6                |         |
| Smoking status <sup>a</sup>        |                        |                   |         |                        |                   |         |                           |                  |         |
| Smoker                             | 17                     | 25                | 0.077   | 10                     | 32                | 0.320   | 14                        | 28               | 1       |
| Nonsmoker                          | 0                      | 6                 |         | 0                      | 6                 |         | 2                         | 4                |         |
| Levels of tumor                    |                        |                   |         |                        |                   |         |                           |                  |         |

|                                |    |    |       |   |    |       |    |    |       |
|--------------------------------|----|----|-------|---|----|-------|----|----|-------|
| markers <sup>a</sup>           |    |    |       |   |    |       |    |    |       |
| Low                            | 9  | 11 | 0.369 | 6 | 14 | 0.292 | 6  | 14 | 1.0   |
| High                           | 8  | 18 |       | 4 | 22 |       | 8  | 18 |       |
| Unknown                        | 0  | 2  |       | 0 | 2  |       | 2  | 0  |       |
| Pathology <sup>a</sup>         |    |    |       |   |    |       |    |    |       |
| ADC                            | 12 | 21 | 1.0   | 8 | 25 | 0.472 | 11 | 22 | 1     |
| SQC                            | 5  | 10 |       | 2 | 13 |       | 5  | 10 |       |
| Recurrent disease <sup>b</sup> |    |    |       |   |    |       |    |    |       |
| Yes                            | 8  | 16 | 0.763 | 5 | 19 | 1     | 6  | 18 | 0.221 |
| No                             | 9  | 15 |       | 5 | 19 |       | 10 | 14 |       |
| Driver mutations <sup>a</sup>  |    |    |       |   |    |       |    |    |       |
| EGFR                           | 0  | 3  | 0.675 | 0 | 1  | 1     | 0  | 3  | 0.116 |
| ALK                            | 0  | 1  |       | 0 | 3  |       | 0  | 1  |       |
| Wild-type                      | 11 | 18 |       | 7 | 22 |       | 10 | 9  |       |
| Unknown                        | 6  | 9  |       | 3 | 12 |       | 6  | 19 |       |

|                                              |            |           |       |           |           |       |           |           |       |
|----------------------------------------------|------------|-----------|-------|-----------|-----------|-------|-----------|-----------|-------|
| PD-L1 status <sup>a</sup>                    |            |           |       |           |           |       |           |           |       |
| Negative                                     | 7          | 4         | 0.246 | 3         | 8         | 1     | 3         | 8         | 0.102 |
| Positive                                     | 7          | 10        |       | 6         | 11        |       | 10        | 7         |       |
| Unknown                                      | 3          | 17        |       | 1         | 19        |       | 3         | 17        |       |
| CD8 expression <sup>a</sup>                  |            |           |       |           |           |       |           |           |       |
| Negative                                     | 4          | 2         | 0.648 | 1         | 5         | 0.630 | 1         | 5         | 0.173 |
| Positive                                     | 10         | 12        |       | 8         | 14        |       | 12        | 10        |       |
| Unknown                                      | 3          | 17        |       | 1         | 19        |       | 3         | 17        |       |
| Mean ± SD number of previous regimens        | 2.18±1.776 | 2.35±1.58 | 0.499 | 2.10±2.18 | 2.34±1.49 | 0.682 | 2.00±1.93 | 2.44±1.48 | 0.388 |
| IrAE <sup>a</sup>                            |            |           |       |           |           |       |           |           |       |
| Absent                                       | 5          | 5         | 0.295 | 3         | 7         | 0.414 | 5         | 5         | 0.267 |
| Present                                      | 12         | 26        |       | 7         | 31        |       | 11        | 27        |       |
| Clinical responses to nivolumab <sup>a</sup> |            |           |       |           |           |       |           |           |       |

|                                                    |    |    |                    |   |    |                     |    |    |                     |
|----------------------------------------------------|----|----|--------------------|---|----|---------------------|----|----|---------------------|
| PR                                                 | 8  | 2  | 0.002 <sup>c</sup> | 7 | 3  | <0.001 <sup>c</sup> | 9  | 1  | <0.001 <sup>c</sup> |
| SD + PD                                            | 9  | 29 |                    | 3 | 35 |                     | 7  | 31 |                     |
| Reasons for treatment discontinuation <sup>a</sup> |    |    |                    |   |    |                     |    |    |                     |
| Disease progression                                | 12 | 22 | 0.314              | 5 | 29 | 0.045 <sup>c</sup>  | 10 | 24 | 0.125               |
| IrAE                                               | 2  | 3  |                    | 2 | 3  |                     | 3  | 2  |                     |
| PS down                                            | 1  | 5  |                    | 1 | 5  |                     | 1  | 5  |                     |
| Death by AMI                                       | 0  | 1  |                    | 0 | 1  |                     | 0  | 1  |                     |
| Treatment continuation                             | 2  | 0  |                    | 2 | 0  |                     | 2  | 0  |                     |

<sup>a</sup>Fisher's exact test. <sup>b</sup> $\chi^2$  test. <sup>c</sup>P<0.05. ADC, adenocarcinoma; ALK, anaplastic lymphoma kinase; AMI, acute myocardial infarction; EGFR, epidermal growth factor; irAE, immune-related adverse events; OAA1, *Oscillatoria agardhii* agglutinin 1; PD-L1, programmed death ligand 1; PR, partial response; PS, performance status; SD + PD, stable or progressive disease; SQC, squamous cell carcinoma.

Table SIII. Multivariate Cox regression analysis of clinicopathological factors and circulating miRNA levels without OAA1 enrichment.

| Clinicopathological characteristic | Hazard ratio (95% CI) | P-value            |
|------------------------------------|-----------------------|--------------------|
| CD8 expression                     |                       |                    |
| Negative                           | 1                     | 0.008 <sup>a</sup> |
| Positive                           | 0.149 (0.037-0.603)   |                    |
| Levels of miR-320a                 |                       |                    |
| Low                                | 1                     | 0.211              |
| High                               | 2.468 (0.599-10.17)   |                    |
| Levels of miR-320b                 |                       |                    |
| Low                                | 1                     | 0.024 <sup>a</sup> |
| High                               | 5.505 (1.247-24.31)   |                    |
| Levels of miR-3613-5p              |                       |                    |
| Low                                | 1                     | 0.048 <sup>a</sup> |

|      |                     |  |
|------|---------------------|--|
| High | 3.152 (1.009-9.847) |  |
|------|---------------------|--|

<sup>a</sup>P<0.05. CI, confidence interval; miR, microRNA; OAA1, *Oscillatoria agardhii* agglutinin 1.

¥

Table SIV. Multivariate Cox regression analysis of clinicopathological factors and circulating miRNA levels with OAA1 enrichment.

| Clinicopathological characteristic | Hazard ratio<br>(95% CI) | P-value |
|------------------------------------|--------------------------|---------|
| CD8 expression                     |                          |         |
| Negative                           | 1                        | 0.301   |
| Positive                           | 0.377 (0.059-2.395)      |         |
| Levels of OAA1 captured miR-320a   |                          |         |
| Low                                | 1                        | 0.684   |
| High                               | 1.518 (0.204-11.29)      |         |
| Levels of OAA1 captured miR-320b   |                          |         |
| Low                                | 1                        | 0.114   |
| High                               | 4.924 (0.682-33.55)      |         |

|                                     |                     |                    |
|-------------------------------------|---------------------|--------------------|
| Levels of OAA1 captured miR-3613-5p |                     |                    |
| Low                                 | 1                   | 0.010 <sup>a</sup> |
| High                                | 7.462 (1.610-34.63) |                    |

<sup>a</sup>P<0.05. CI, confidence interval; miR, microRNA; OAA1, *Oscillatoria agardhii* agglutinin 1.
